# Supplementary material for: Characterization and oncolytic virus targeting of FAP-expressing tumor-associated pericytes in glioblastoma
Source: Springer Nature journal article supplement (doi:10.1186/s40478-020-01096-0), 2020-12-01
Supplement: MOESM1 [file 25667478]

Supplementary Figure S1

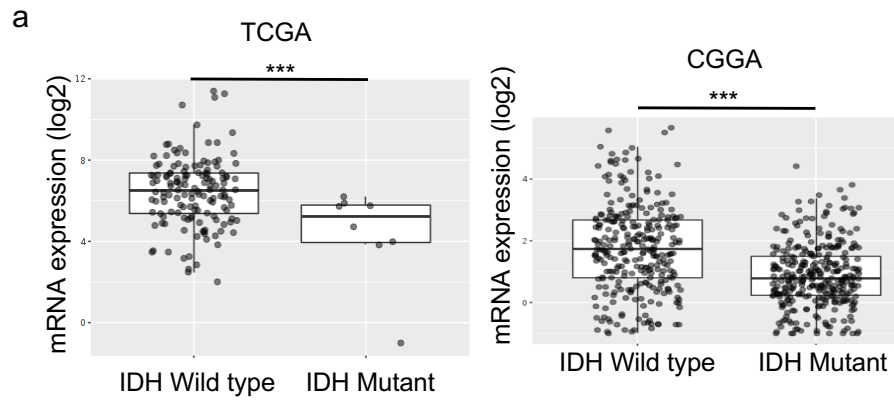

**b**

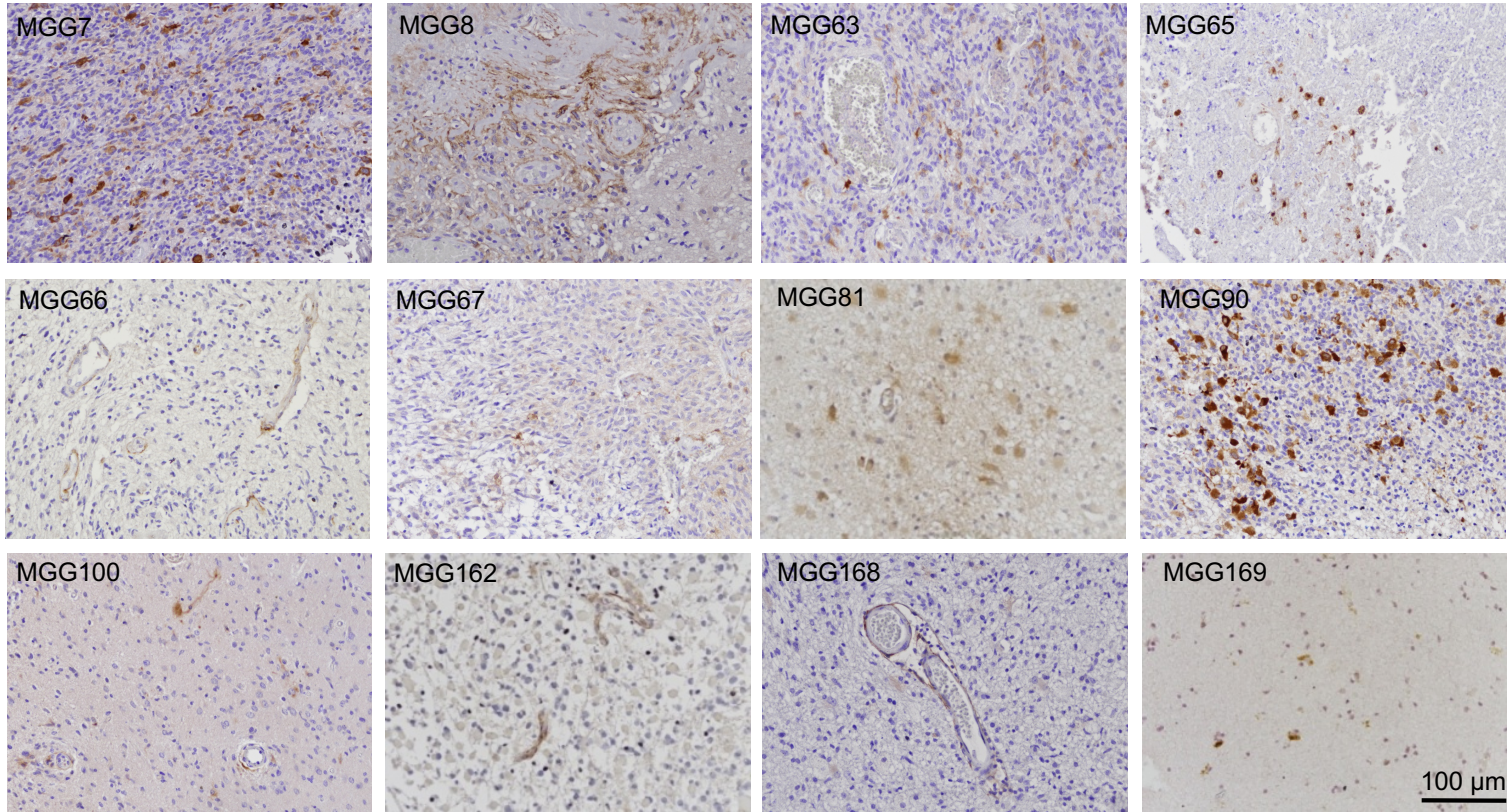

**Supplementary Figure S1. The presence of FAP-positive cells in human glioma tissue. a**, FAP mRNA levels of IDH wild type and mutant gliomas in the TCGA and CGGA datasets. Analysis at Gliovis. \*\*\* $p < 0.001$ . **b**, Immunohistochemistry (IHC) of FAP in human glioma tissues from 12 additional patients.

Supplementary Figure S2

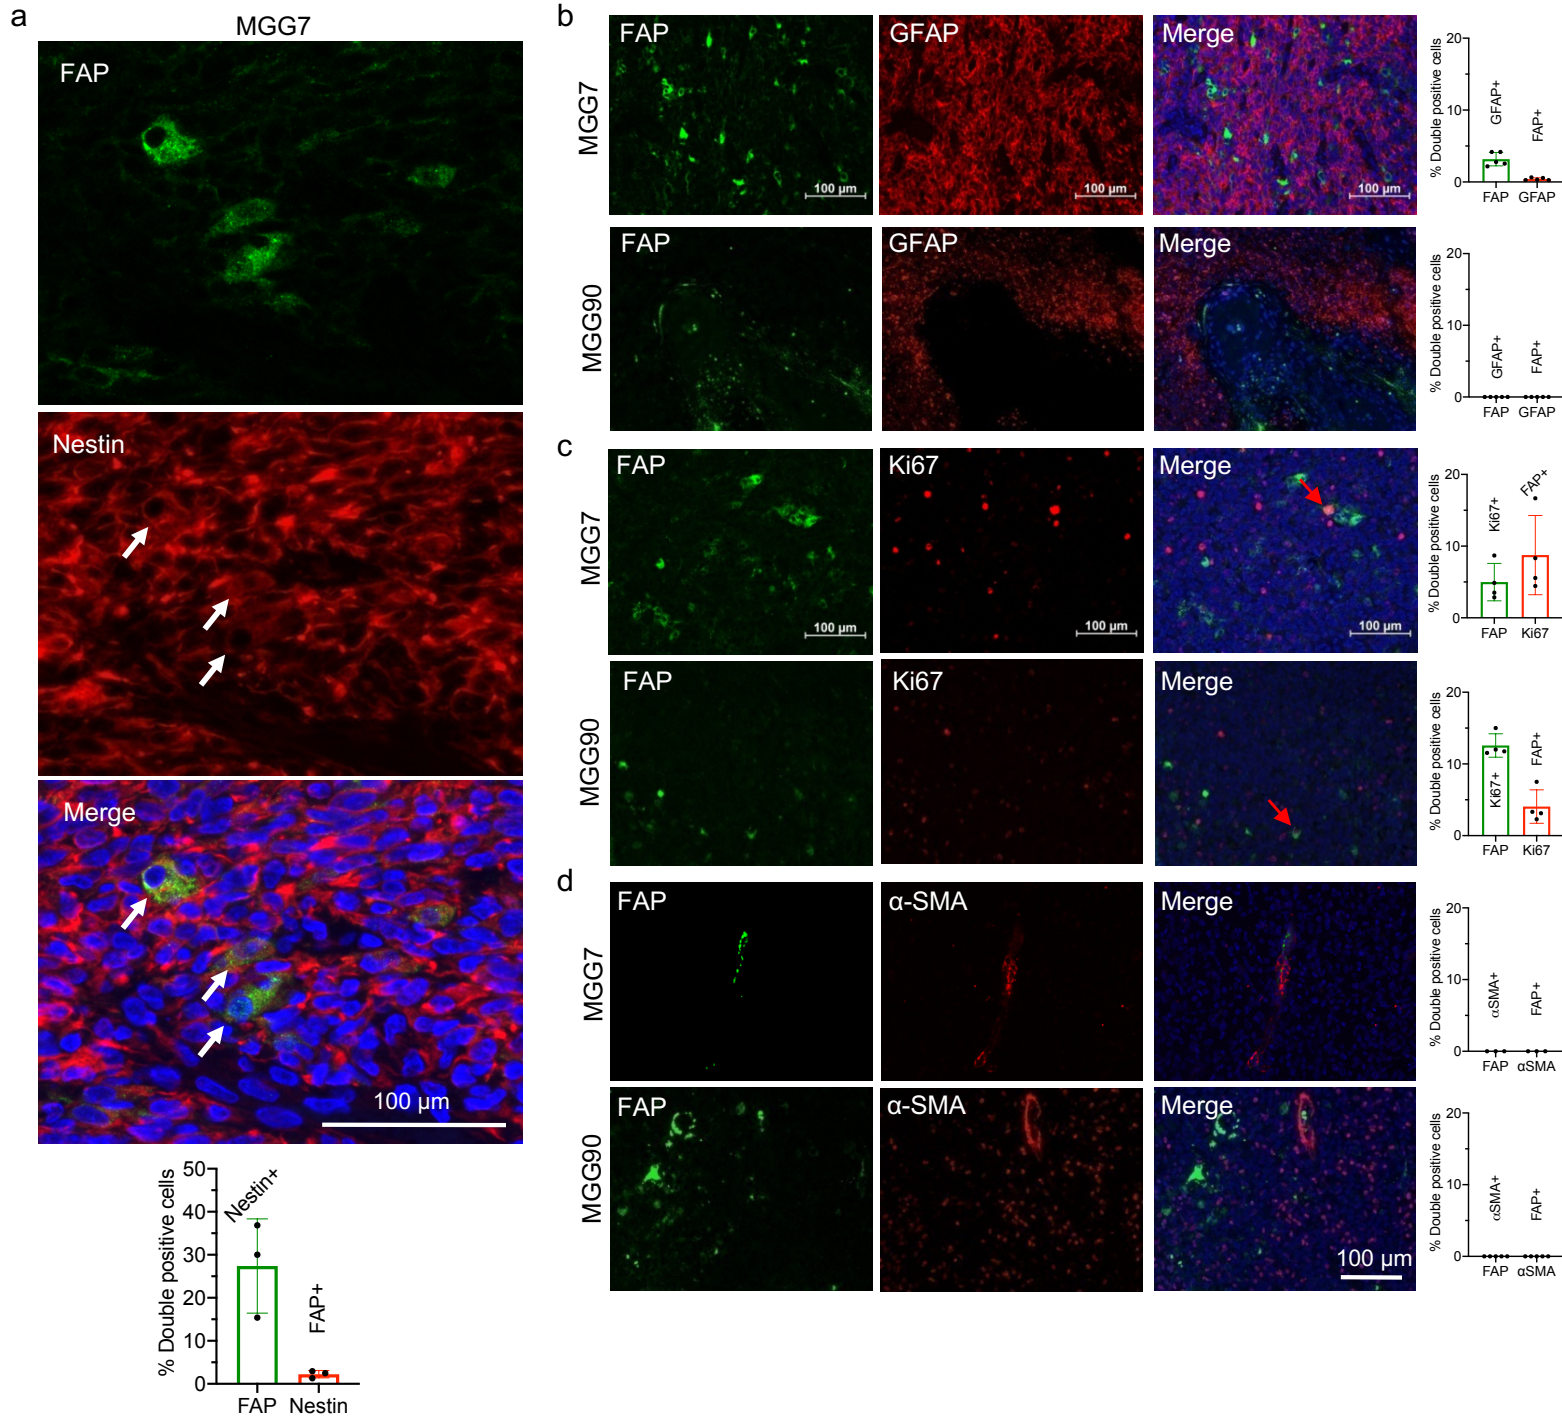

**Supplementary Figure S2. Characterization of FAP+ cells in human glioblastoma.** a, Double immunofluorescence of FAP (green) and nestin (red), showing double positive cells in MGG7 GBM. Arrows, double-positive cells. Quantification on the bottom. b-d, Double immunofluorescence of FAP and astrocytes marker GFAP (b), tumor proliferation maker Ki67(c), and perivascular marker  $\alpha$ -SMA (d). Red arrows point to representative double positive cells. Quantification on the right. (no FAP+/ $\alpha$ -SMA+ cells or FAP+/GFAP+ MGG90 cells). Error bars, SD.

Supplementary Figure S3

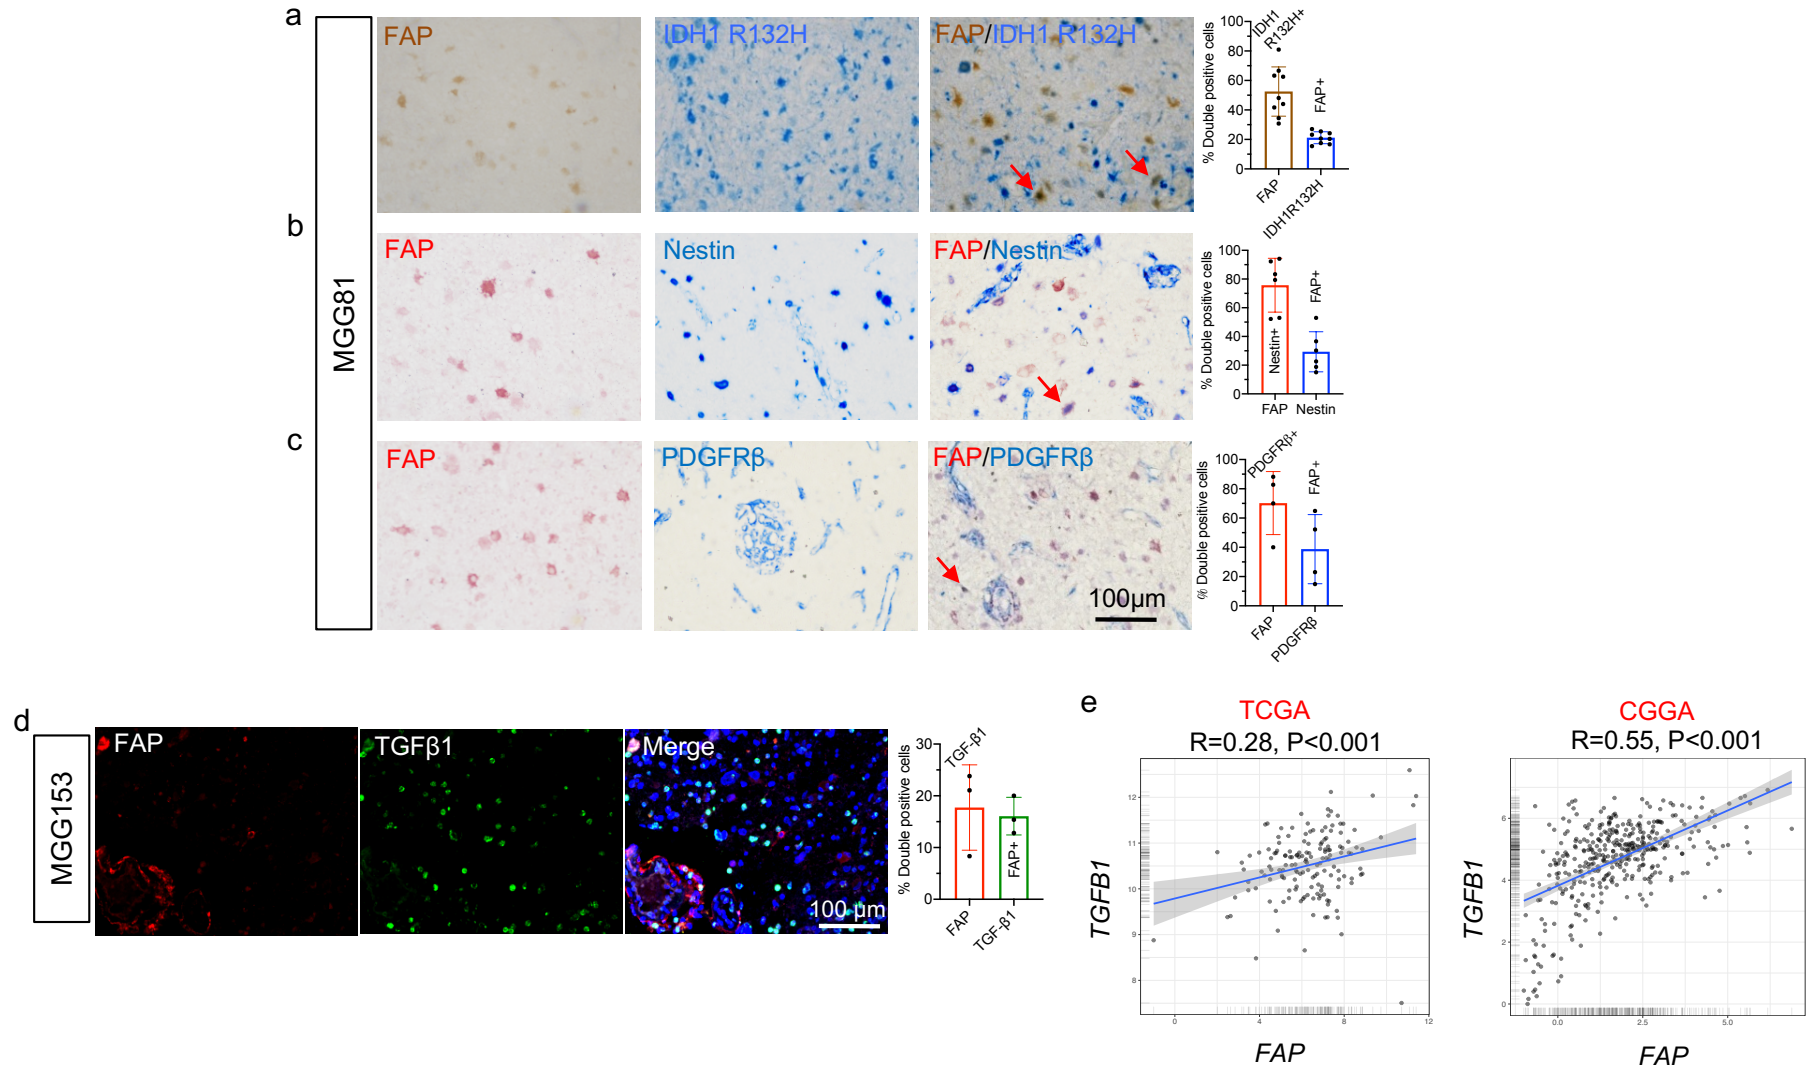

**Supplementary Figure S3. Characterization of FAP+ cells in human glioblastoma.**

a-c, Double immunohistochemistry of FAP (red or brown) and IDH1R132H (blue)(a), nestin (blue)(b), and PDGFR $\beta$  (blue)(c) in MGG81 (*IDH1*-mutant). Red arrows point to representative double positive cells. Quantification on the right. d, Double immunofluorescence of FAP (red) and TGF- $\beta$ 1 (green) and quantification of positivity in MGG153 (*IDH*-wild-type). Error bars, SD. e, Correlation between FAP and TGF $\beta$ 1 mRNA levels in TCGA and CGGA datasets of GBM (RNAseq). Analysis at Gliovis. R, Pearson's R.

Supplementary Figure S4

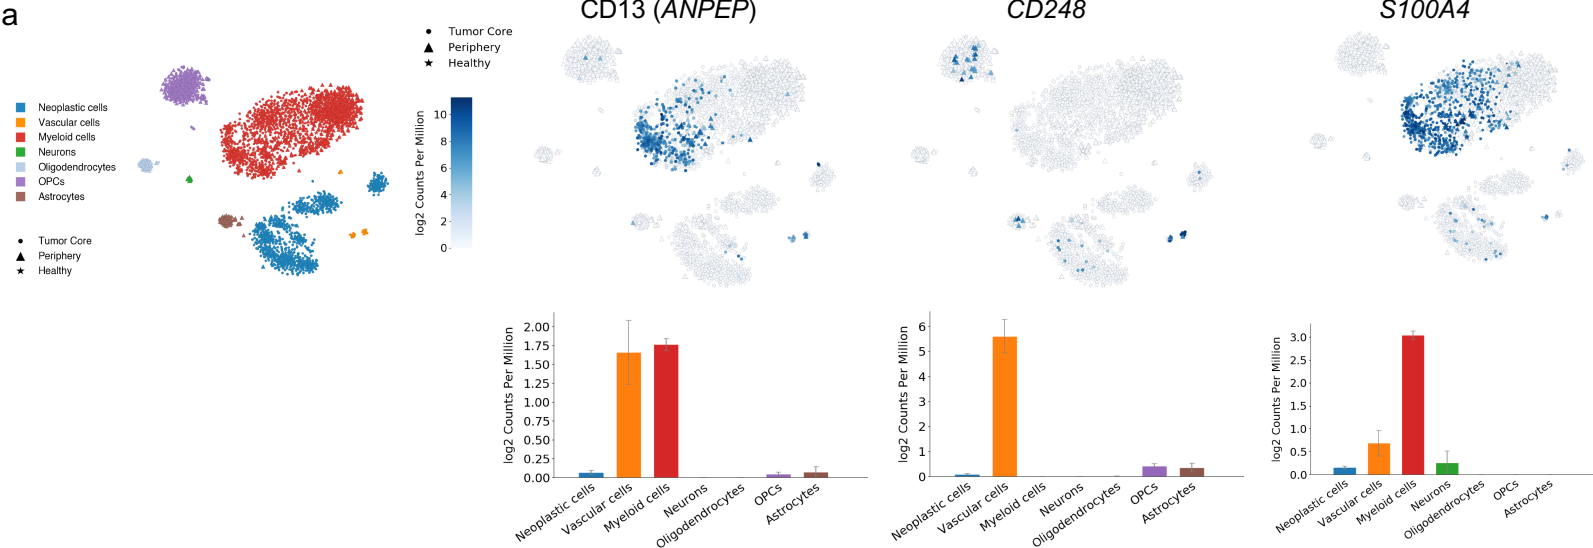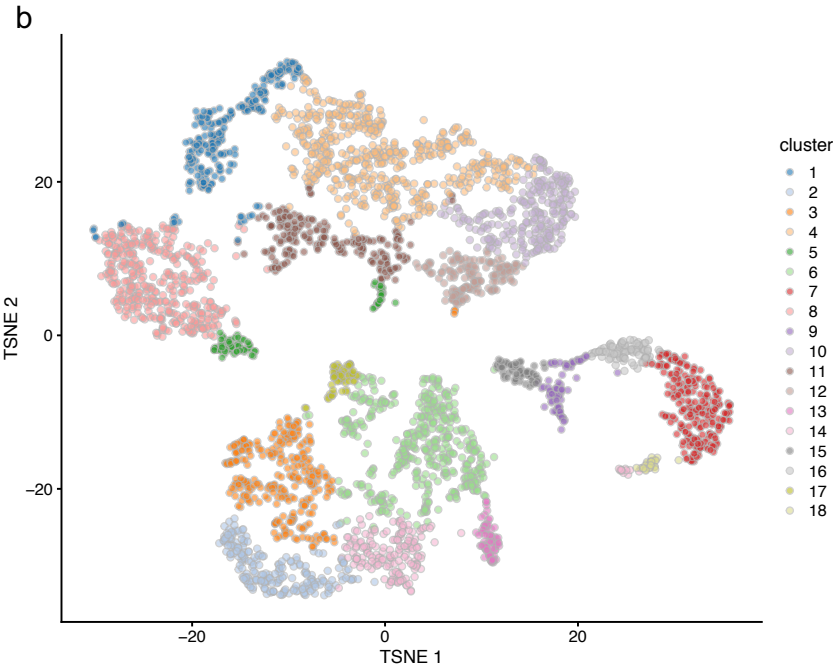

**Supplementary Figure S4. Single cell RNA sequencing analysis of human glioblastoma (Darmanis et al data).** **a**, Mapping of pericyte markers CD13 (*ANPEP*) and CD248 and CAF maker FSP (*S100A4*) onto tSNE cell clusters of single cell RNAseq analysis of GBM. **b**, New 2D tSNE clustering of all cells, generating 18 clusters of cells.

Supplementary Figure S5

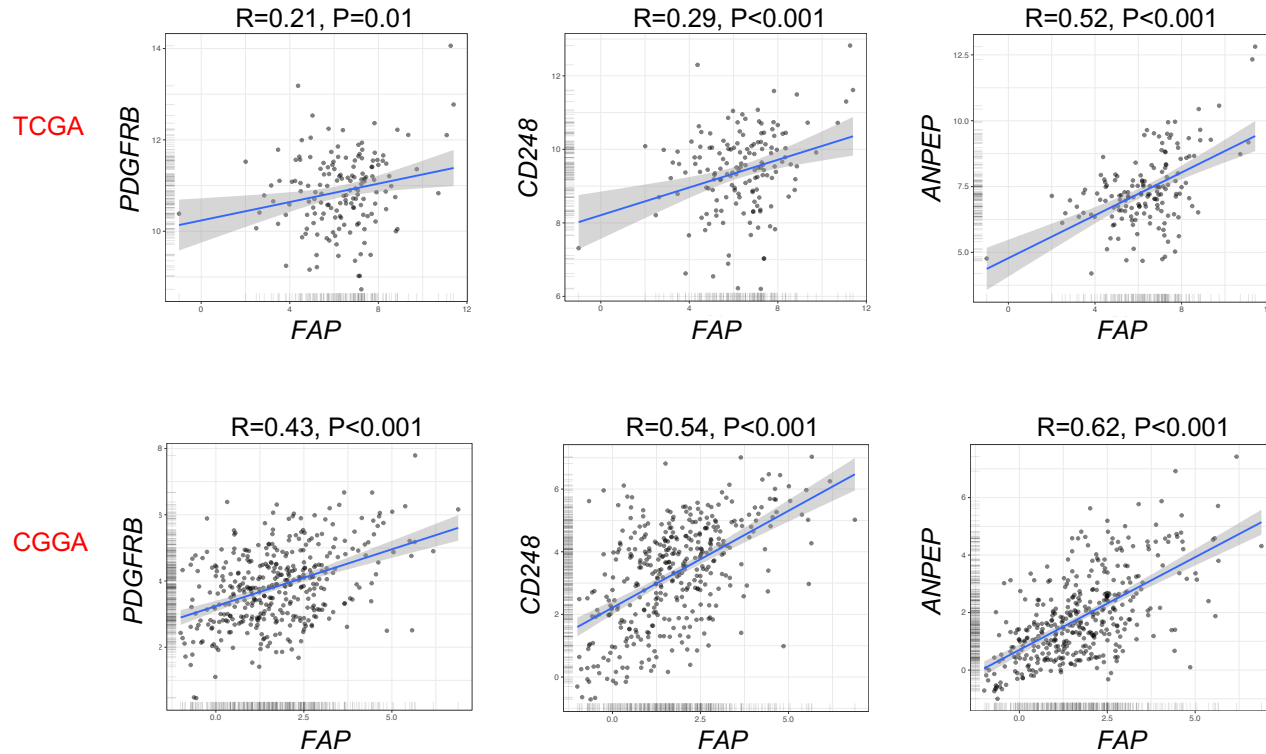

**Supplementary Figure S5.** Correlation between FAP and pericyte makers in bulk RNA datasets. Correlation between *FAP* and *PDGFRB*, *CD248*, and *ANPEP* in the TCGA and CGGA GBM datasets is shown. Analysis at Gliovis. R, Pearson's R.

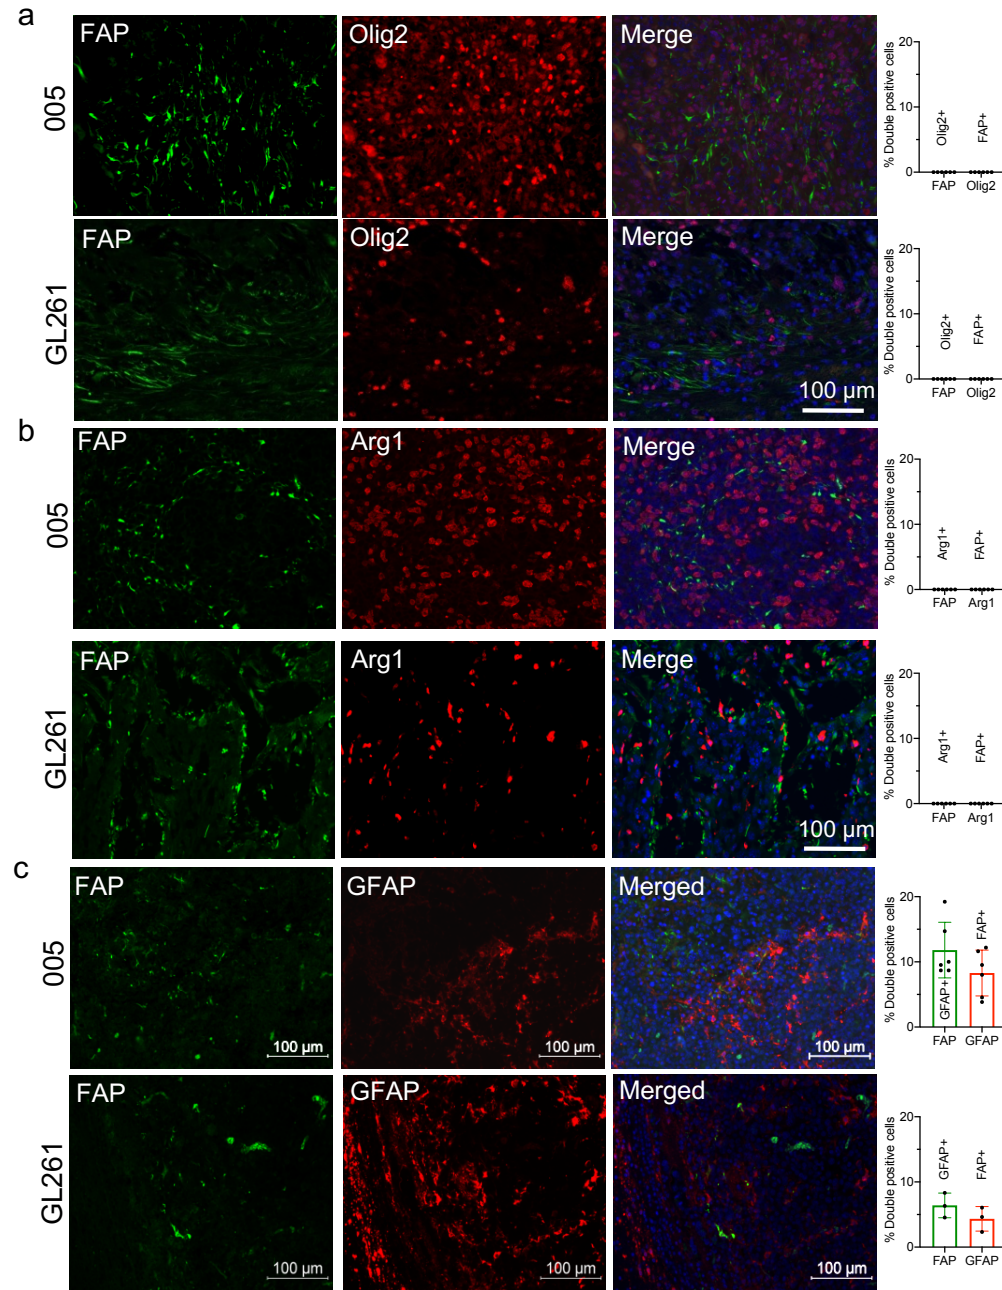

**Supplementary Figure S6. Biological characteristics of FAP+ cells in mouse glioblastoma.**

a-c, Double immunofluorescence of FAP with oligodendrocyte/glioma marker olig2 (a), M2 macrophage marker Arg1 (b), and astrocyte marker GFAP (c). Quantification plots on the right. (no FAP+/Olig2+ or FAP+/Arg1+ cells). Error bars, SD.

Supplementary Figure S7

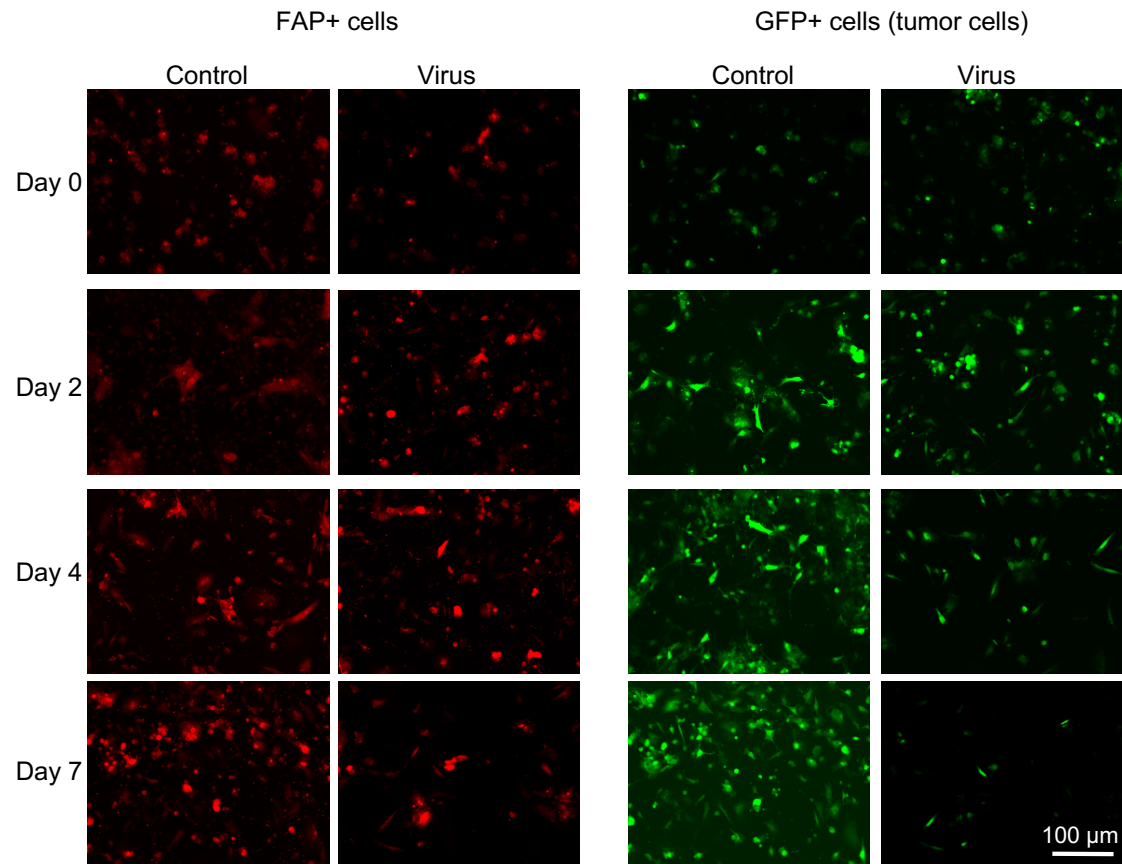

**Supplementary Figure S7. Oncolytic adenovirus targets mouse FAP+ cells and glioblastoma cells in vitro.** Immunofluorescence for FAP and GFP at different time-point after ICOVIR15 treatment of 005 GBM-derived cells in vitro. See Figure 5f for quantification of cell number.

## Supplementary Table S1

### Primary antibodies used in this work

| Antibody      | Source            | Catalogue number | Host species | Note             |
|---------------|-------------------|------------------|--------------|------------------|
| FAP           | Abcam             | Ab207178         | Rabbit       | For human FAP    |
| FAP           | Aviva systems bio | OAAF01790        | Rabbit       | For mouse FAP    |
| Nestin        | Santa Cruz        | SC23927          | Mouse        | For human nestin |
| Nestin        | Millipore Sigma   | MAM353           | Mouse        | For mouse nestin |
| Ki67          | Dako              | 65742            | Mouse        |                  |
| $\alpha$ SMA  | Thermo Fisher     | 14-9760-82       | Mouse        |                  |
| IDH1 R132H    | ScyTek            | DIA-H09          | Mouse        |                  |
| PDGFR $\beta$ | Cell Signaling    | 3169             | Rabbit       |                  |
| TGF $\beta$ 1 | R&D Systems       | MAB240           | Mouse        |                  |
| GFAP          | Sigma             | G3893            | Mouse        |                  |
| GFP           | Abcam             | Ab183734         | Rabbit       |                  |
| Arg1          | Santa Cruz        | Sc-271430        | Mouse        |                  |
| Olig2         | Millipore         | MABN50           | Mouse        |                  |
| Hexon         | Millipore Sigma   | AB1056           | Goat         |                  |
